# Supplementary material for: Vertical Integration in the Pediatrics Clerkship: A Case Study
Source: MDPI journal article supplement (doi:10.3390/educsci13060545), 2023-05-25
Supplement: s1 [file s1]

**Supplementary Table S1. Mapping of Learning Objectives to Embedded Student Questions**

| Discipline          | Learning Objective                                                                                                                                                                                                                                                                                                                                                                                                                                                                                                                                                                                                                                                                                                                                                                                                                                                                                      | Associated Case Questions for Students                                                                                                                                                                                                                                                                                                                                                                                                                                                                                                                                                                                                                                                                                                                                                                          |
|---------------------|---------------------------------------------------------------------------------------------------------------------------------------------------------------------------------------------------------------------------------------------------------------------------------------------------------------------------------------------------------------------------------------------------------------------------------------------------------------------------------------------------------------------------------------------------------------------------------------------------------------------------------------------------------------------------------------------------------------------------------------------------------------------------------------------------------------------------------------------------------------------------------------------------------|-----------------------------------------------------------------------------------------------------------------------------------------------------------------------------------------------------------------------------------------------------------------------------------------------------------------------------------------------------------------------------------------------------------------------------------------------------------------------------------------------------------------------------------------------------------------------------------------------------------------------------------------------------------------------------------------------------------------------------------------------------------------------------------------------------------------|
| Anatomy             | <ol style="list-style-type: none"> <li>1. Review the structures that make up the upper and lower airways and the structure that divides them</li> <li>2. Describe the anatomical structures affected by asthma and contrast them with structures affected by other respiratory illnesses like rhinovirus or pneumonia</li> </ol>                                                                                                                                                                                                                                                                                                                                                                                                                                                                                                                                                                        | <p>Review embryonic lung development and why preterm children often have lung issues.</p> <p>Describe the anatomical structures affected by asthma and contrast them with structures affected by other respiratory illnesses like rhinovirus or pneumonia</p> <p>How is a diagnosis of asthma made?</p> <p>Describe the structures of and the boundary between upper and lower airways. Compare normal airway structures with that of an asthmatic.</p>                                                                                                                                                                                                                                                                                                                                                         |
| Allergy/ Immunology | <ol style="list-style-type: none"> <li>1. Explain the sequence and manifestations of a Type I hypersensitivity Reaction</li> <li>2. Explain the immediate and late phases of allergy</li> <li>3. Explain asthma as a manifestation of allergy</li> </ol>                                                                                                                                                                                                                                                                                                                                                                                                                                                                                                                                                                                                                                                | <p>What are the hypersensitivity reactions?</p> <p>Which type (of hypersensitivity reaction) is playing a role in the pathology of asthma?</p> <p>How do changes in upper vs. lower airway structures correlate with presenting symptoms/signs?</p> <p>How do you know when a patient is in respiratory distress?</p> <p>What on physical exam indicates this?</p> <p>Think not just about vital signs and auscultation but also what you will observe when you walk into the room.</p> <p>What are the risk factors for asthma here? (consider: preterm birth, stress, air pollution, tobacco smoke, physical activity)</p>                                                                                                                                                                                    |
| Biochemistry        | <ol style="list-style-type: none"> <li>1. Given a patient presenting with a severe asthma attack, identify the major factors that can contribute to a mixed acidosis.</li> <li>2. Given a patient that with a lactic acidosis secondary to a hyperadrenergic state, provide a biochemical model that integrates lipid and carbohydrate metabolism in liver, adipose and muscle tissue to account for the metabolic acidosis</li> </ol>                                                                                                                                                                                                                                                                                                                                                                                                                                                                  | <p>What are possible consequences of the patient's prolonged tachypnea on the ABG?</p> <p>What is the cause of the elevated lactate levels? Comment on potential causes of hypoglycemia. How do you explain the CBC results?</p> <p>Differentiate Type A from Type B lactic acidosis and identify the clinical findings that help differentiate between the two acidosis.</p> <p>Compare the physical exam findings of a patient presenting with active asthma to a patient presenting with metabolic acidosis secondary to a hyperadrenergic state.</p> <p>Review the biochemistry of the metabolic acidosis created by a hyperadrenergic state (including catecholamine regulation of carbohydrate metabolism in liver and adipose tissue and the effect of fatty acid oxidation on pyruvate metabolism).</p> |
| Microbiology        | <ol style="list-style-type: none"> <li>1. Describe epidemiology of respiratory viruses as a cause of asthma exacerbations</li> <li>2. List respiratory viruses commonly causing asthma exacerbations</li> <li>3. Analyze the pathophysiology of why certain respiratory viral infections increase the risk of asthma exacerbations and secondary bacterial infections</li> <li>4. Describe classic presentations of respiratory viral infections in a child with asthma</li> <li>5. Describe and compare commonly used diagnostic tests for respiratory viruses</li> <li>6. List available therapeutic options for common respiratory viruses and their indications in children</li> <li>7. Analyze what system-based practices can be taken in a pediatric practice to reduce the risk of respiratory viral infections and their complications in children with a known diagnosis of asthma</li> </ol> | <p>What are the risk factors for asthma here? (consider: preterm birth, stress, air pollution, tobacco smoke, physical activity)</p> <p>Do you think this child's symptoms could be due to an infection?</p> <p>If yes, which organisms could be responsible, and how would you confirm your suspicion?</p> <p>Would you start Marcus on antibiotics?</p> <p>What needs to be done before starting?</p> <p>What is the role of infection in hyperreactive airway disease?</p> <p>Which organisms are usual causative agents in children's lung disease?</p> <p>Describe the change in cellular functioning and how it relates to observable clinical symptoms.</p> <p>How do changes in upper vs. lower airway structures correlate with presenting symptoms/signs?</p>                                         |

|                                |                                                                                                                                                                                                                                                                                                                                                                                                                                     |                                                                                                                                                                                                                                                                                                                                                                                                                                                                                                                                                                                                                                                                                                                                                                                                                                                                                                                                                        |
|--------------------------------|-------------------------------------------------------------------------------------------------------------------------------------------------------------------------------------------------------------------------------------------------------------------------------------------------------------------------------------------------------------------------------------------------------------------------------------|--------------------------------------------------------------------------------------------------------------------------------------------------------------------------------------------------------------------------------------------------------------------------------------------------------------------------------------------------------------------------------------------------------------------------------------------------------------------------------------------------------------------------------------------------------------------------------------------------------------------------------------------------------------------------------------------------------------------------------------------------------------------------------------------------------------------------------------------------------------------------------------------------------------------------------------------------------|
| Physiology                     | <ol style="list-style-type: none"> <li>1. Explain the mechanisms of action and potential side effects of medications used in asthma management</li> <li>2. Interpret pulmonary function tests (PFTs) and compare normal PFTs with those observed in obstructive lung disease</li> <li>3. Interpret arterial blood gas measurements in the context of a patient's course and make decisions about subsequent patient care</li> </ol> | <p>How is a diagnosis of asthma made?</p> <p>What are the mechanisms of action of albuterol and dexamethasone?</p> <p>In a patient with an obstructive lung disease, what changes in pulmonary function tests (PFTs) may occur following albuterol administration?</p> <p>Interpret PFTs given in a series of graphs in the context of obstructive and restrictive lung disease.</p> <p>Calculate the anion gap and explain the results.</p> <p>Explain the bicarbonate level.</p> <p>Brainstorm some explanations for the mixed acidosis that Marcus is experiencing at this time.</p> <p>What are possible consequences of the patient's prolonged tachypnea on the ABG?</p> <p>What is the cause of the elevated lactate levels? How do you explain the CBC results?</p> <p>Compare the physical exam findings of a patient presenting with active asthma to a patient presenting with metabolic acidosis secondary to a hyperadrenergic state.</p> |
| Pharmacology                   | <ol style="list-style-type: none"> <li>1. Provide rationale for using bronchodilators and steroids during acute asthma</li> <li>2. Describe the side effects of frequent administration of Albuterol</li> </ol>                                                                                                                                                                                                                     | <p>What is the mechanism of action of dexamethasone?</p> <p>Why was Marcus administered IV steroids rather than via inhaler or a nebulizer?</p> <p>The patient's blood pressure drops following additional nebulizer treatments: explain how might excess albuterol be related to hypotension and the acid-base disturbances that the patient is experiencing.</p> <p>What medications should Marcus be discharged on?</p>                                                                                                                                                                                                                                                                                                                                                                                                                                                                                                                             |
| Social and Family Determinants | <ol style="list-style-type: none"> <li>1. Recognize the psychosocial impact of asthma on pediatric patients and their families</li> <li>2. Assess addressable asthma exacerbation risks and educational needs for patients and families</li> <li>3. Recognize inequities, and our own assumptions/biases, in assessing and engaging with patients and families</li> </ol>                                                           | <p>Is there anything different about taking an ABG from a child vs. an adult?</p> <p>How is the whole family affected by asthma?</p> <p>Think about how chronic, life-long, and life-threatening illnesses impact individual patients and their families throughout the lifespan.</p> <p>Think about the experience of a child left alone overnight in a hospital.</p> <p>What social determinants of health, and other environmental and socioeconomic factors, might affect short- and long-term prognosis and morbidity and mortality risks in a child with asthma? How would knowledge of these factors affect the provider's treatment decisions and discharge planning, as well as patient and family education strategy?</p> <p>Develop a discharge plan.</p> <p>What discharge instructions are to be given to the father?</p>                                                                                                                 |

| Discipline                     | Learning Objective                                                                                                                                                                                                                                                                                                                                                                                                                                                                                                                                                                                                                                                                                                                                                                                                                                                                                      | Associated Case Questions for Students                                                                                                                                                                                                                                                                                                                                                                                                                                                                                                                                                                                                                                                                                                                                                                                                                                                                                                   |
|--------------------------------|---------------------------------------------------------------------------------------------------------------------------------------------------------------------------------------------------------------------------------------------------------------------------------------------------------------------------------------------------------------------------------------------------------------------------------------------------------------------------------------------------------------------------------------------------------------------------------------------------------------------------------------------------------------------------------------------------------------------------------------------------------------------------------------------------------------------------------------------------------------------------------------------------------|------------------------------------------------------------------------------------------------------------------------------------------------------------------------------------------------------------------------------------------------------------------------------------------------------------------------------------------------------------------------------------------------------------------------------------------------------------------------------------------------------------------------------------------------------------------------------------------------------------------------------------------------------------------------------------------------------------------------------------------------------------------------------------------------------------------------------------------------------------------------------------------------------------------------------------------|
| Anatomy                        | <ol style="list-style-type: none"> <li>1. Review the structures that make up the upper and lower airways and the structure that divides them</li> <li>2. Describe the anatomical structures affected by asthma and contrast them with structures affected by other respiratory illnesses like rhinovirus or pneumonia</li> </ol>                                                                                                                                                                                                                                                                                                                                                                                                                                                                                                                                                                        | <p>Review embryonic lung development and why preterm children often have lung issues.</p> <p>Describe the anatomical structures affected by asthma and contrast them with structures affected by other respiratory illnesses like rhinovirus or pneumonia</p> <p>How is a diagnosis of asthma made?</p> <p>Describe the structures of and the boundary between upper and lower airways. Compare normal airway structures with that of an asthmatic.</p>                                                                                                                                                                                                                                                                                                                                                                                                                                                                                  |
| Allergy/Immunology             | <ol style="list-style-type: none"> <li>1. Explain the sequence and manifestations of a Type I hypersensitivity Reaction</li> <li>2. Explain the immediate and late phases of allergy</li> <li>3. Explain asthma as a manifestation of allergy</li> </ol>                                                                                                                                                                                                                                                                                                                                                                                                                                                                                                                                                                                                                                                | <p>What are the hypersensitivity reactions?</p> <p>Which type (of hypersensitivity reaction) is playing a role in the pathology of asthma?</p> <p>How do changes in upper vs. lower airway structures correlate with presenting symptoms/signs?</p> <p>How do you know when a patient is in respiratory distress?</p> <p>What on physical exam indicates this?</p> <p>Think not just about vital signs and auscultation but also what you will observe when you walk into the room.</p> <p>What are the risk factors for asthma here? (consider: preterm birth, stress, air pollution, tobacco smoke, physical activity)</p>                                                                                                                                                                                                                                                                                                             |
| Biochemistry                   | <ol style="list-style-type: none"> <li>1. Given a patient presenting with a severe asthma attack, identify the major factors that can contribute to a mixed acidosis.</li> <li>2. Given a patient that with a lactic acidosis secondary to a hyperadrenergic state, provide a biochemical model that integrates lipid and carbohydrate metabolism in liver, adipose and muscle tissue to account for the metabolic acidosis</li> </ol>                                                                                                                                                                                                                                                                                                                                                                                                                                                                  | <p>What are possible consequences of the patient's prolonged tachypnea on the ABG? What is the cause of the elevated lactate levels? Comment on potential causes of hypoglycemia. How do you explain the CBC results?</p> <p>Differentiate Type A from Type B lactic acidosis and identify the clinical findings that help differentiate between the two acidosis.</p> <p>Compare the physical exam findings of a patient presenting with active asthma to a patient presenting with metabolic acidosis secondary to a hyperadrenergic state.</p> <p>Review the biochemistry of the metabolic acidosis created by a hyperadrenergic state (including catecholamine regulation of carbohydrate metabolism in liver and adipose tissue and the effect of fatty acid oxidation on pyruvate metabolism).</p>                                                                                                                                 |
| Microbiology                   | <ol style="list-style-type: none"> <li>1. Describe epidemiology of respiratory viruses as a cause of asthma exacerbations</li> <li>2. List respiratory viruses commonly causing asthma exacerbations</li> <li>3. Analyze the pathophysiology of why certain respiratory viral infections increase the risk of asthma exacerbations and secondary bacterial infections</li> <li>4. Describe classic presentations of respiratory viral infections in a child with asthma</li> <li>5. Describe and compare commonly used diagnostic tests for respiratory viruses</li> <li>6. List available therapeutic options for common respiratory viruses and their indications in children</li> <li>7. Analyze what system-based practices can be taken in a pediatric practice to reduce the risk of respiratory viral infections and their complications in children with a known diagnosis of asthma</li> </ol> | <p>What are the risk factors for asthma here? (consider: preterm birth, stress, air pollution, tobacco smoke, physical activity)</p> <p>Do you think this child's symptoms could be due to an infection?</p> <p>If yes, which organisms could be responsible, and how would you confirm your suspicion?</p> <p>Would you start Marcus on antibiotics?</p> <p>What needs to be done before starting?</p> <p>What is the role of infection in hyperreactive airway disease?</p> <p>Which organisms are usual causative agents in children's lung disease?</p> <p>Describe the change in cellular functioning and how it relates to observable clinical symptoms.</p> <p>How do changes in upper vs. lower airway structures correlate with presenting symptoms/signs?</p>                                                                                                                                                                  |
| Physiology                     | <ol style="list-style-type: none"> <li>1. Explain the mechanisms of action and potential side effects of medications used in asthma management</li> <li>2. Interpret pulmonary function tests (PFTs) and compare normal PFTs with those observed in obstructive lung disease</li> <li>3. Interpret arterial blood gas measurements in the context of a patient's course and make decisions about subsequent patient care</li> </ol>                                                                                                                                                                                                                                                                                                                                                                                                                                                                     | <p>How is a diagnosis of asthma made?</p> <p>What are the mechanisms of action of albuterol and dexamethasone?</p> <p>In a patient with an obstructive lung disease, what changes in pulmonary function tests (PFTs) may occur following albuterol administration?</p> <p>Interpret PFTs given in a series of graphs in the context of obstructive and restrictive lung disease.</p> <p>Calculate the anion gap and explain the results.</p> <p>Explain the bicarbonate level.</p> <p>Brainstorm some explanations for the mixed acidosis that Marcus is experiencing at this time.</p> <p>What are possible consequences of the patient's prolonged tachypnea on the ABG? What is the cause of the elevated lactate levels? How do you explain the CBC results? Compare the physical exam findings of a patient presenting with active asthma to a patient presenting with metabolic acidosis secondary to a hyperadrenergic state.</p> |
| Pharmacology                   | <ol style="list-style-type: none"> <li>1. Provide rationale for using bronchodilators and steroids during acute asthma</li> <li>2. Describe the side effects of frequent administration of Albuterol</li> </ol>                                                                                                                                                                                                                                                                                                                                                                                                                                                                                                                                                                                                                                                                                         | <p>What is the mechanism of action of dexamethasone?</p> <p>Why was Marcus administered IV steroids rather than via inhaler or a nebulizer?</p> <p>The patient's blood pressure drops following additional nebulizer treatments: explain how might excess albuterol be related to hypotension and the acid-base disturbances that the patient is experiencing.</p> <p>What medications should Marcus be discharged on?</p>                                                                                                                                                                                                                                                                                                                                                                                                                                                                                                               |
| Social and Family Determinants | <ol style="list-style-type: none"> <li>1. Recognize the psychosocial impact of asthma on pediatric patients and their families</li> <li>2. Assess addressable asthma exacerbation risks and educational needs for patients and families</li> </ol>                                                                                                                                                                                                                                                                                                                                                                                                                                                                                                                                                                                                                                                      | <p>Is there anything different about taking an ABG from a child vs. an adult?</p> <p>How is the whole family affected by asthma?</p>                                                                                                                                                                                                                                                                                                                                                                                                                                                                                                                                                                                                                                                                                                                                                                                                     |

|  |                                                                                                                      |                                                                                                                                                                                                                                                                                                                                                                                                                                                                                                                                                                                                                                                                                                   |
|--|----------------------------------------------------------------------------------------------------------------------|---------------------------------------------------------------------------------------------------------------------------------------------------------------------------------------------------------------------------------------------------------------------------------------------------------------------------------------------------------------------------------------------------------------------------------------------------------------------------------------------------------------------------------------------------------------------------------------------------------------------------------------------------------------------------------------------------|
|  | <p>3. Recognize inequities, and our own assumptions/biases, in assessing and engaging with patients and families</p> | <p>Think about how chronic, life-long, and life-threatening illnesses impact individual patients and their families throughout the lifespan.</p> <p>Think about the experience of a child left alone overnight in a hospital.</p> <p>What social determinants of health, and other environmental and socioeconomic factors, might affect short- and long-term prognosis and morbidity and mortality risks in a child with asthma? How would knowledge of these factors affect the provider's treatment decisions and discharge planning, as well as patient and family education strategy?</p> <p>Develop a discharge plan.</p> <p>What discharge instructions are to be given to the father?</p> |
|--|----------------------------------------------------------------------------------------------------------------------|---------------------------------------------------------------------------------------------------------------------------------------------------------------------------------------------------------------------------------------------------------------------------------------------------------------------------------------------------------------------------------------------------------------------------------------------------------------------------------------------------------------------------------------------------------------------------------------------------------------------------------------------------------------------------------------------------|
